# Supplementary material for: Self-assembly of new M(ii) coordination polymers based on asymmetric 1,3,4-oxadiazole-containing ligands: effect of counterions and magnetic properties
Source: Royal Society of Chemistry journal article supplement (doi:10.1039/c7ce01379e), 2017-01-01
Supplement: c7ce01379e1.pdf [file c7ce01379e1.pdf]

**Table S1** Crystallographic Data for **1-3**

|                                                                                  | <b>1</b>                                                        | <b>2</b>                                                         | <b>3</b>                                                        |
|----------------------------------------------------------------------------------|-----------------------------------------------------------------|------------------------------------------------------------------|-----------------------------------------------------------------|
| Empirical formula                                                                | C <sub>16</sub> H <sub>10</sub> CdN <sub>6</sub> O <sub>7</sub> | C <sub>16</sub> H <sub>10</sub> N <sub>6</sub> O <sub>7</sub> Zn | C <sub>16</sub> H <sub>10</sub> CuN <sub>6</sub> O <sub>7</sub> |
| fw                                                                               | 510.70                                                          | 463.67                                                           | 461.84                                                          |
| cryst syst                                                                       | Monoclinic                                                      | Orthorhombic                                                     | Orthorhombic                                                    |
| <i>a</i> (Å)                                                                     | 17.3051(5)                                                      | 7.8558(3)                                                        | 7.838(3)                                                        |
| <i>b</i> (Å)                                                                     | 8.1682(2)                                                       | 13.5861(5)                                                       | 30.941(7)                                                       |
| <i>c</i> (Å)                                                                     | 12.9742(4)                                                      | 31.5006(14)                                                      | 13.665(8)                                                       |
| <i>α</i> (°)                                                                     | 90                                                              | 90                                                               | 90                                                              |
| <i>β</i> (°)                                                                     | 108.332(3)                                                      | 90                                                               | 90                                                              |
| <i>γ</i> (°)                                                                     | 90                                                              | 90                                                               | 90                                                              |
| <i>V</i> (Å <sup>3</sup> )                                                       | 1740.85(9)                                                      | 3362.1(2)                                                        | 3314(2)                                                         |
| space Group                                                                      | <i>P</i> 2 <sub>1</sub> / <i>c</i>                              | <i>Pbca</i>                                                      | <i>Pbca</i>                                                     |
| <i>Z</i> value                                                                   | 4                                                               | 8                                                                | 8                                                               |
| <i>ρ</i> calc. (g/cm <sup>3</sup> )                                              | 1.949                                                           | 1.832                                                            | 1.851                                                           |
| <i>μ</i> (mm <sup>-1</sup> )                                                     | 1.313                                                           | 1.522                                                            | 1.380                                                           |
| temp(K)                                                                          | 298(2)                                                          | 298(2)                                                           | 298(2)                                                          |
| Data / restraints / parameters                                                   | 3556 / 0 / 271                                                  | 3139 / 0 / 271                                                   | 3078 / 30 / 299                                                 |
| Final R indices<br>[ <i>I</i> > 2σ( <i>I</i> ): <i>R</i> ; <i>R</i> <sub>w</sub> | 0.0293; 0.0595                                                  | 0.0401; 0.0926                                                   | 0.1007; 0.2553                                                  |

$$^a RI = \sum ||F_o| - |F_c|| / \sum |F_o|. \quad wR2 = \{ \sum [w(F_o^2 - F_c^2)^2] / \sum [w(F_o^2)^2] \}^{1/2}$$

**Table S2** Crystallographic Data for **4-6**

|                   | <b>4</b>                                                                         | <b>5</b>                                                                         | <b>6</b>                                                                        |
|-------------------|----------------------------------------------------------------------------------|----------------------------------------------------------------------------------|---------------------------------------------------------------------------------|
| Empirical formula | C <sub>32</sub> H <sub>20</sub> CdCl <sub>2</sub> N <sub>8</sub> O <sub>10</sub> | C <sub>32</sub> H <sub>20</sub> Cl <sub>2</sub> CuN <sub>8</sub> O <sub>10</sub> | C <sub>17</sub> H <sub>11</sub> CdCl <sub>3</sub> N <sub>6</sub> O <sub>7</sub> |
| fw                | 843.86                                                                           | 811.00                                                                           | 630.07                                                                          |
| cryst syst        | Monoclinic                                                                       | Trigonal                                                                         | Monoclinic                                                                      |
| <i>a</i> (Å)      | 26.783(3)                                                                        | 30.6123(10)                                                                      | 9.5455(4)                                                                       |
| <i>b</i> (Å)      | 10.9091(10)                                                                      | 30.6123(10)                                                                      | 13.8394(6)                                                                      |
| <i>c</i> (Å)      | 28.532(4)                                                                        | 29.4707(12)                                                                      | 17.2740(8)                                                                      |
| <i>α</i> (°)      | 90                                                                               | 90                                                                               | 90                                                                              |

|                                      |                 |                 |                         |
|--------------------------------------|-----------------|-----------------|-------------------------|
| $\beta$ (°)                          | 145.631(6)      | 90              | 102.492(4)              |
| $\gamma$ (°)                         | 90              | 120             | 90                      |
| $V$ (Å <sup>3</sup> )                | 4706.1(9)       | 23917.4(15)     | 2 2227.93(17)           |
| space Group                          | <i>C2/c</i>     | <i>R-3</i>      | <i>P2<sub>1</sub>/n</i> |
| Z value                              | 4               | 18              | 4                       |
| $\rho$ calc. (g/cm <sup>3</sup> )    | 1.191           | 1.014           | 1.878                   |
| $\mu$ (mm <sup>-1</sup> )            | 0.626           | 0.557           | 1.393                   |
| temp(K)                              | 103(4)          | 108(11)         | 298(2)                  |
| Data / restraints / parameters       | 4811 / 21 / 244 | 10855 / 0 / 481 | 4151 / 0 / 307          |
| Final R indices<br>[I>2sigma(I)]: R; | 0.1037; 0.2998  | 0.1114; 0.3184  | 0.0341; 0.0638          |

$$^a RI = \Sigma ||F_o| - |F_c|| / \Sigma |F_o|. \quad wR2 = \{ \Sigma [w(F_o^2 - F_c^2)^2] / \Sigma [w(F_o^2)^2] \}^{1/2}$$

**Table S3** Hydrogen bonds for **4** [Å and °]

| D-H...A                         | d(D-H) | d(H...A) | d(D...A)  | ∠(DHA) |
|---------------------------------|--------|----------|-----------|--------|
| C(13)-H(13)...O(2) <sup>3</sup> | 0.93   | 2.34     | 3.043(14) | 131.8  |
| C(16)-H(16)...O(1)              | 0.93   | 2.43     | 2.788(10) | 102.5  |
| C(9)-H(9) ...O(3) <sup>2</sup>  | 0.93   | 2.60     | 3.299(19) | 132.0  |
| C(9)-H(9) ...O(2)               | 0.93   | 2.56     | 3.442(15) | 159.0  |

Symmetry transformations used to generate equivalent atoms:

$$^2\text{-X, +Y, 1/2-Z; } ^3\text{1/2-X, -1/2+Y, 1/2-Z}$$

**Table S4** Hydrogen bonds for **5** [Å and °]

| D-H...A                         | d(D-H) | d(H...A) | d(D...A) | ∠(DHA) |
|---------------------------------|--------|----------|----------|--------|
| C(29)-H(29)...O(6) <sup>1</sup> | 0.93   | 2.57     | 3.357(8) | 142.1  |

Symmetry transformations used to generate equivalent atoms:

$$^1\text{ 2/3-Y+X, 1/3+X, 1/3-Z}$$

**Table S5.** The result of “TOPOS 4.0 professional”.

#####

5:C32 H20 Cl2 Cu N8 O10

#####

### Topology for Cu1

-----

Atom Cu1 links by bridge ligands and has

| Common vertex with |         |        |        |          | R(A-A)  |   |
|--------------------|---------|--------|--------|----------|---------|---|
| Cu 2               | 0.1667  | 0.8333 | 0.3333 | ( 0 1 0) | 10.110A | 1 |
| Cu 2               | -0.1667 | 0.1667 | 0.6667 | ( 0 0 1) | 10.110A | 1 |
| Cu 2               | 0.1667  | 0.3333 | 0.3333 | ( 0 0 0) | 10.110A | 1 |
| Cu 2               | -0.1667 | 0.6667 | 0.6667 | ( 0 1 1) | 10.110A | 1 |

### Topology for Cu2

-----

Atom Cu2 links by bridge ligands and has

| Common vertex with |         |        |        |          | R(A-A)  |   |
|--------------------|---------|--------|--------|----------|---------|---|
| Cu 1               | 0.3333  | 0.1667 | 0.1667 | ( 0 0 0) | 10.110A | 1 |
| Cu 1               | 0.0000  | 0.5000 | 0.5000 | ( 0 0 0) | 10.110A | 1 |
| Cu 1               | -0.1667 | 0.1667 | 0.1667 | (-1-1 0) | 10.110A | 1 |
| Cu 1               | 0.5000  | 0.5000 | 0.5000 | ( 1 1 0) | 10.110A | 1 |

-----

### Structural group analysis

-----

-----

### Structural group No 1

-----

Structure consists of 3D framework with Cu

### Coordination sequences

-----

|      |   |    |    |    |     |     |     |     |     |      |
|------|---|----|----|----|-----|-----|-----|-----|-----|------|
| Cu1: | 1 | 2  | 3  | 4  | 5   | 6   | 7   | 8   | 9   | 10   |
| Num  | 4 | 12 | 28 | 50 | 76  | 110 | 148 | 194 | 244 | 302  |
| Cum  | 5 | 17 | 45 | 95 | 171 | 281 | 429 | 623 | 867 | 1169 |

-----  
 Cu2: 1 2 3 4 5 6 7 8 9 10  
 Num 4 12 28 50 76 110 148 194 244 302  
 Cum 5 17 45 95 171 281 429 623 867 1169  
 -----

TD10=1169

Vertex symbols for selected sublattice

-----  
 Cu1 Point symbol: {6^4.8^2}  
 Extended point symbol:[6(2).6(2).6(2).6(2).8(6).8(6)]  
 -----

Cu2 Point symbol: {6^4.8^2}  
 Extended point symbol:[6(2).6(2).6(2).6(2).8(6).8(6)]  
 -----

Point symbol for net: {6^4.8^2}

4-c net; uninodal net

Topological type: nbo NbO; 4/6/c2; sqc35 (topos&RCSR.ttd) {6^4.8^2} - VS  
 [6(2).6(2).6(2).6(2).8(2).8(2)] (73689 types in 11 databases)

Elapsed time: 10.74 sec.

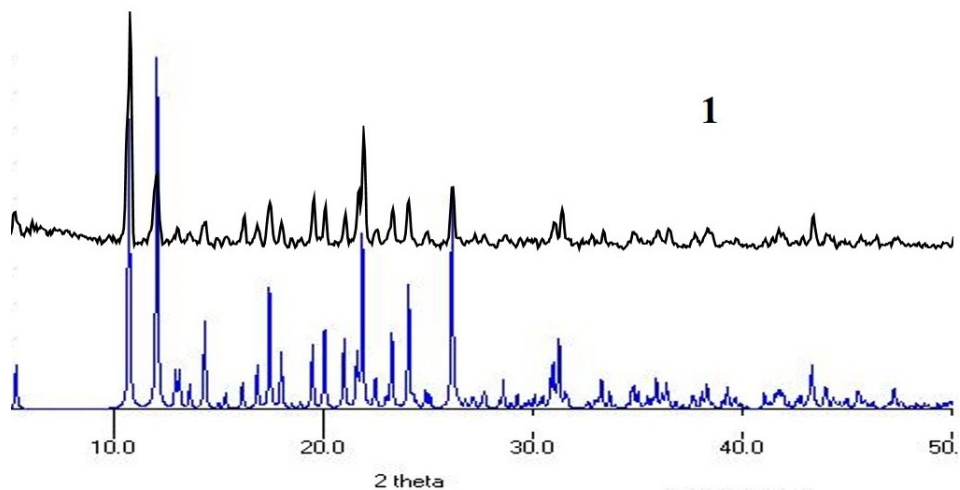

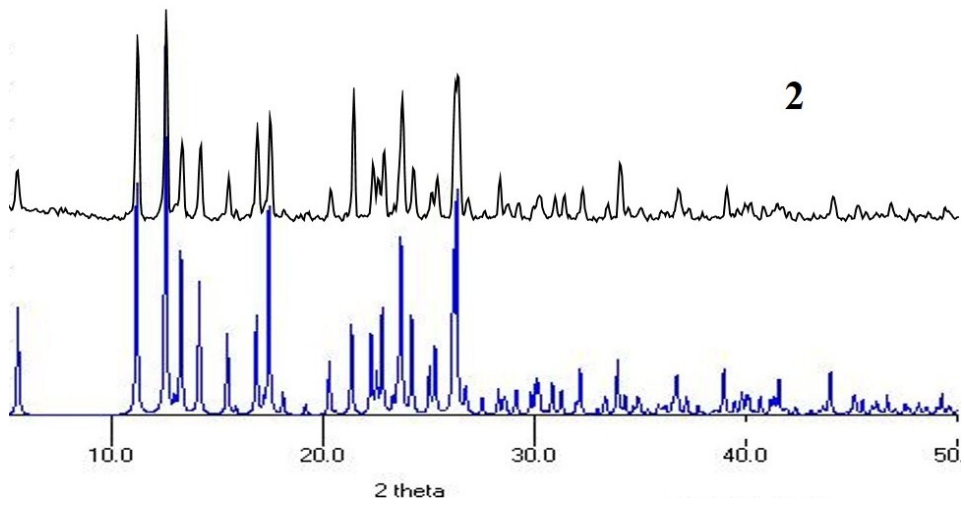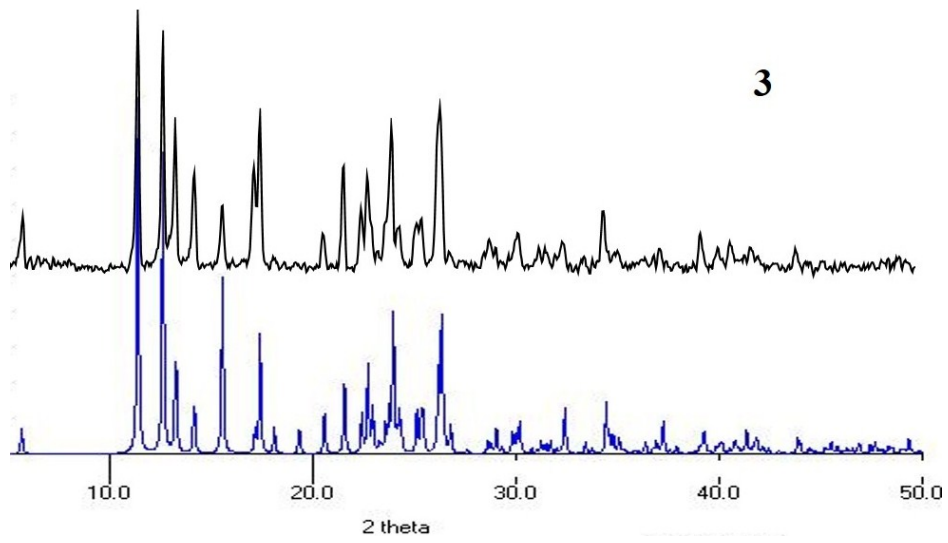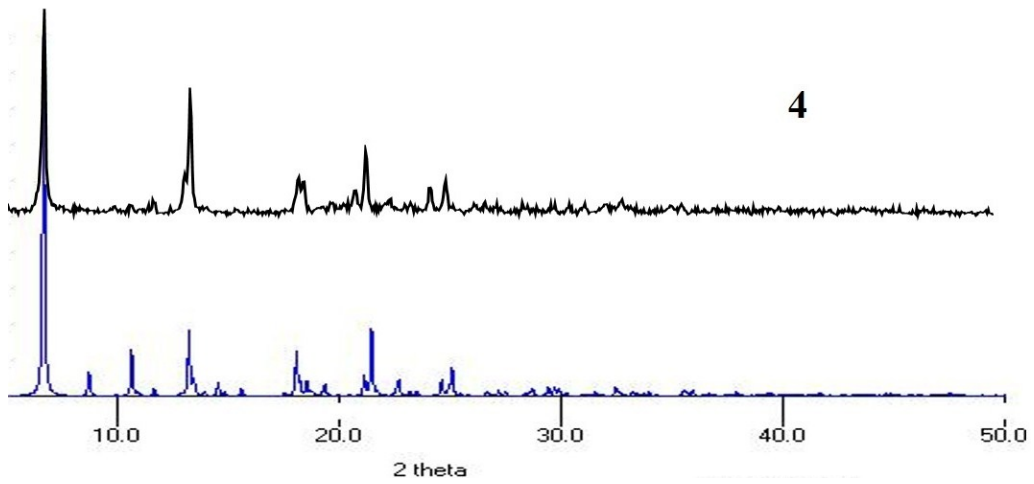

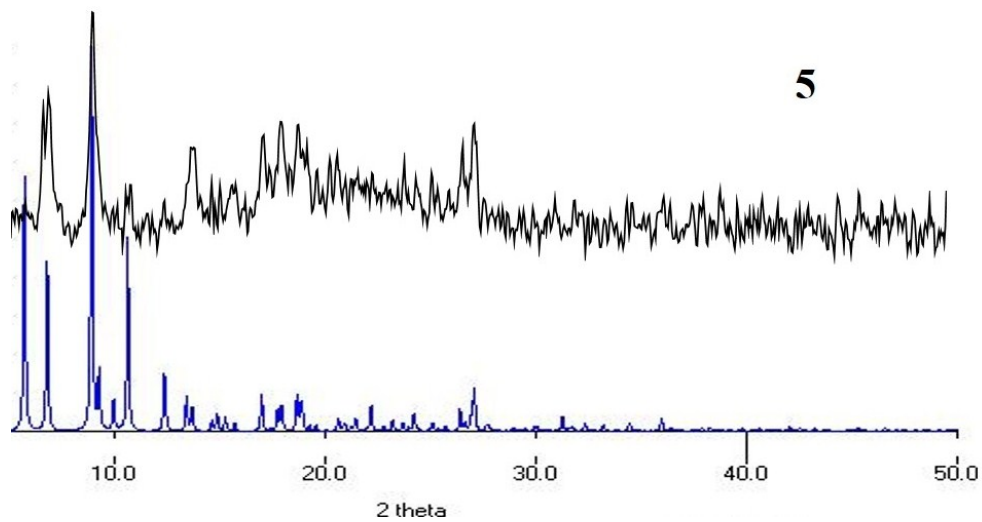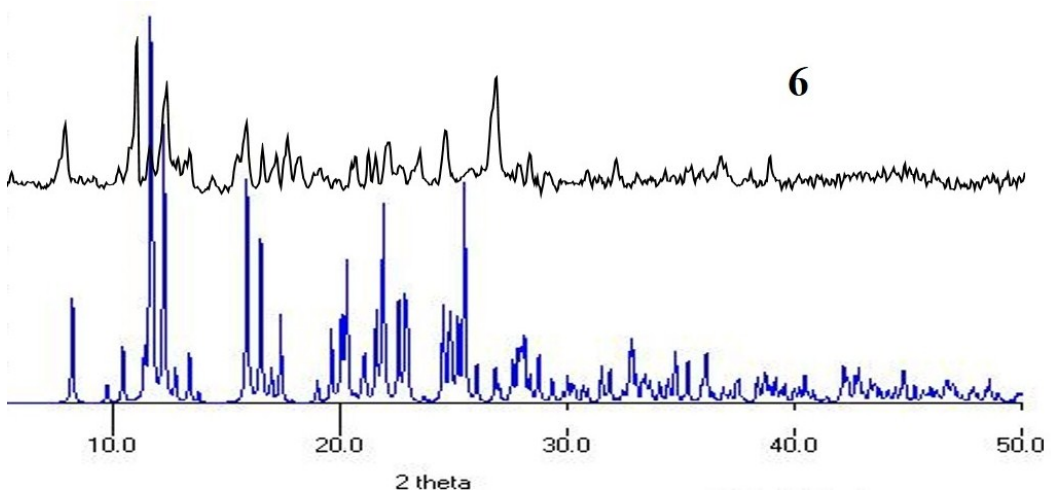

Fig. S1 Simulated (blue) and experimental (black) powder X-ray diffraction (PXRD) patterns of **1–6**.

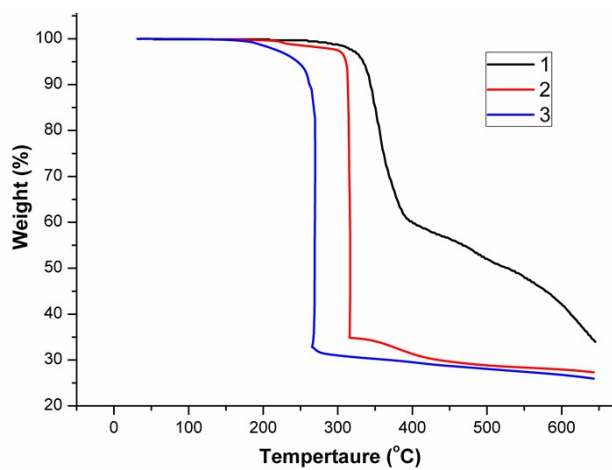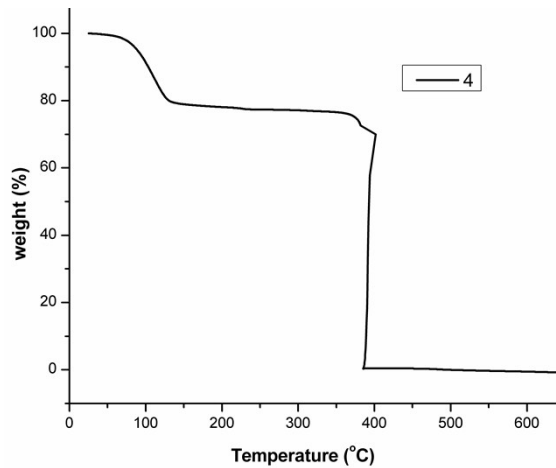

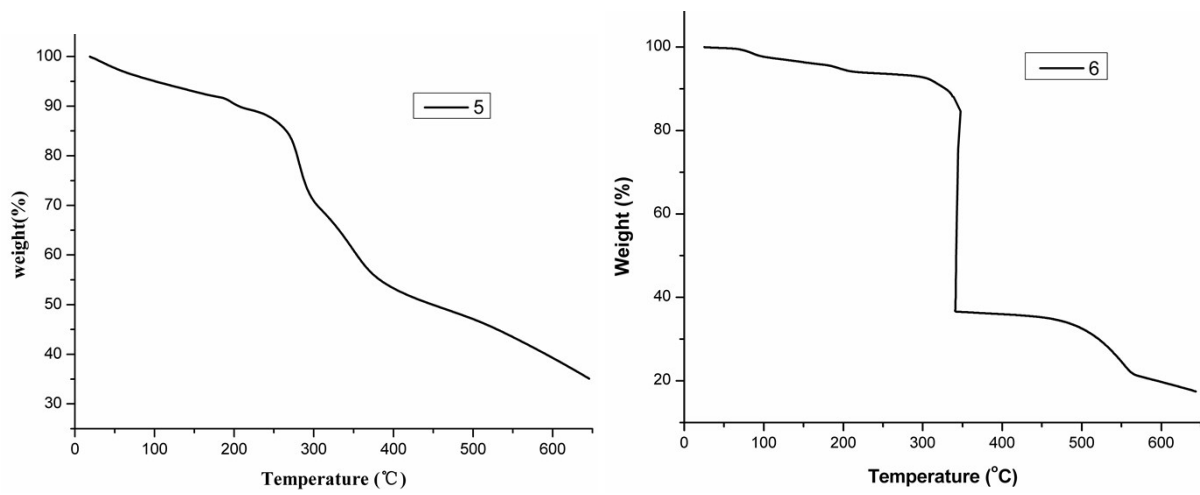

Fig. S2 TGA curves of 1–6.

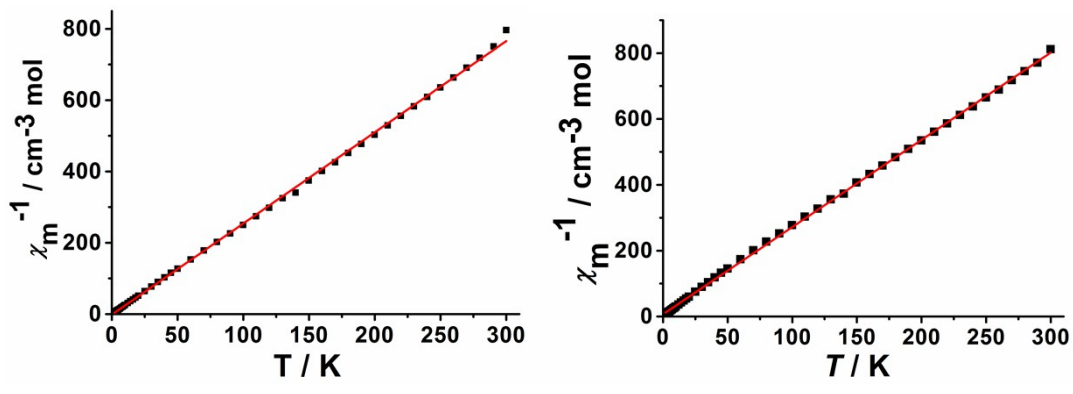

Figure S3. Temperature dependence of  $\chi_M^{-1}$  values of of 3 (left) and 5 (right) in the temperature range of 2-300 K under 1000 Oe field. Solid lines represent the fitting data.
